# Supplementary material for: The Halotolerant Rhizobacterium—Pseudomonas koreensis MU2 Enhances Inorganic Silicon and Phosphorus Use Efficiency and Augments Salt Stress Tolerance in Soybean (Glycine max L.)
Source: PubMed Central journal article supplement (PMC7570339; doi:10.3390/microorganisms8091256), 2020-08-19
Supplement: microorganisms-08-01256-s001.pdf [file microorganisms-08-01256-s001.pdf]

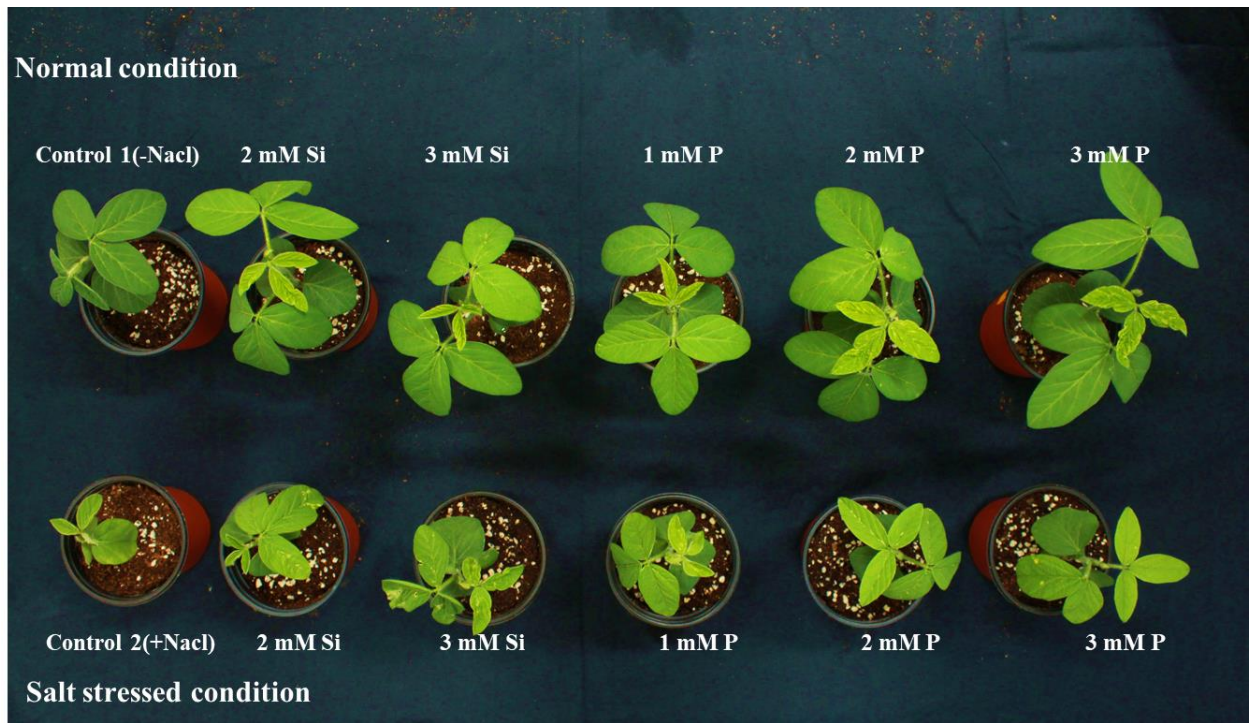

Figure S1. Effect of different doses of silicon and phosphorus on morphological attributes of soybean plants under normal and salt stressed condition.
